# Supplementary material for: Copper- and palladium-catalyzed intramolecular C–S bond formation: a convenient synthesis of 2-aminobenzothiazoles
Source: Royal Society of Chemistry journal article supplement (doi:10.1039/b311591g), 2004-01-01
Supplement: b311591g.doc [file b311591g.doc]

SUPPORTING INFORMATION

“Copper and Palladium Catalyzed Intramolecular C–S Bond Formation: A Convenient Synthesis of 2-Aminobenzothiazoles” by Laurie L. Joyce, Ghotas Evindar, and Robert A. Batey*

# **General Experimental**

THF was distilled from sodium wire in the presence of benzophenone under nitrogen. All other solvents and reagents were used as received (ACP Chemicals, Aldrich, Fisher Scientific, or Stream Chemicals).

Melting points were taken using a Fisher-Johns flat-bed melting point apparatus, and melting points are uncorrected. FT-IR spectra were obtained on a Perkin Elmer Spectrum 1000 spectrometer, with samples loaded as films on NaCl plates. 1H and 13C NMR spectra were obtained on Varian Unity 400 or Varian Mercury 300 spectrometers as solutions in CDCl3 (with 0.05% v/v TMS) or DMSO-d6. Proton chemical shifts were internally referenced to the TMS proton resonance (0.00) for CDCl3, and to the residual proton resonance in DMSO-d6 (2.50). Carbon chemical shifts were internally referenced to the deuterated solvent signals in CDCl3 (77.00) and DMSO-d6 (39.51). Low resolution mass spectra (MS) were recorded on a Bell and Howell 21-490 spectrometer, and high resolution spectra were recorded on an AEI MS3074 spectrometer.

## Flash column chromatography on ultra pure silica gel (40-60 m, 230-400 mesh, obtained from Whatman Company Silicycle) was performed with reagent grade hexanes and ethyl acetate). Analytical thin-layer chromatography (TLC), was performed on aluminum-backed pre-coated silica gel plates (0.2 mm thickness, 60 Å, Alugram Sil G/UV254 purchased from Macherey-Nagel GmbH & Co.), visualized with a UV254 lamp (Spectroline, Longlife Filter), and stained with ninhydrin. Solvent systems used to determine R*f* values and for chromatography are reported as v/v ratios.

**General Procedure for the preparation of 2-Aminobenzothiazoles**

To a mixture of thiourea (1) (0.5 mmol, 1 equiv.), Cs2CO3 (1.0 mmol, 2 equiv.), and Pd(PPh3)4 (0.025 mmol, 0.5 mol%), or CuI (0.025 mmol, 0.5 mol%) and 1,10-phenanthroline (0.05 mol, 0.1 mol%), was added dimethoxyethane (4 mL). The reaction mixture was heated at 80C for 16-24 h. under nitrogen, diluted with EtOAc (50 mL), and then washed with H2O (2  50 mL), followed by sat. aq. NaCl (50 mL). The organic layer was dried over MgSO4, solvent removed *in vacuo*, and the crude product purified using silica gel flash column chromatography.

**Benzothiazol-2-yl-benzyl-amine:** *(Table 1, entry 1)*

Obtained in 95% yield (Pd cat., 84% conv.) and 99% yield (Cu cat., >98% conv.) from 2-bromophenylthiourea; Obtained in 99% yield (Pd cat., >98% conv.) and 99% yield (Cu cat., >98% conv.) from 2-iodophenylthiourea; White solid; m.p = 164-168°C (CH2Cl2/CDCl3); Rƒ = 0.45 (2:1 hexanes:EtOAc); IR (NaCl)  3085, 2897, 1620, 1573, 1453, 1356, 1268, 972, 884, 745, 699 cm-1; 1H NMR (300 MHz, CDCl3)  7.56 (1H, ddd, *J* = 7.8, 1.3, 0.7 Hz), 7.52 (1H, ddd, *J* = 8.1, 1.2, 0.7 Hz), 7.41-7.19 (6H, m, aromatics), 7.07 (1H, ddd, *J* = 7.3, 6.6,1.2 Hz), 5.70 (1H, bs), 4.63 (2H, s); 13C NMR (75 MHz, CDCl3)  166.94, 152.03, 137.20, 130.31, 128.63, 127.69, 127.49, 125.79, 121.51, 120.65, 118.86, 49.46; MS (EI) *m/e* 241 (16), 240 (80, M+), 239 (23), 136 (13), 106 (26), 91 (100), 65 (29); HRMS (EI) *m/e* (M+) calcd. 240.0721, found 220.0722.

**Benzothiazol-2-yl-(4-chloro-benzyl)-amine:** *(Table 1, entry 2)*

Obtained in 86% yield (Pd cat., 90% conv.) and 70% yield (Cu cat., 95% conv.); White crystalline solid; m.p = 175-180°C (CH2Cl2/CDCl3); Rƒ = 0.40 (2:1 hexanes:EtOAc); IR (NaCl)  3176, 2849, 1610, 1575, 1559, 1406, 1314, 1266, 812, 752, 728 cm-1; 1H NMR (300 MHz, CDCl3)  7.60-7.56 (1H, dd, *J* = 7.8, 0.7 Hz), 7.51-7.47 (1H, d, *J* = 8.1 Hz), 7.37-7.23 (5H, m, aromatics), 7.10 (1H, t, *J* = 7.4 Hz), 5.97 (1H, bs), 4.62 (2H, s); 13C NMR (75 MHz, CDCl3)  167.25, 152.19, 136.03, 133.68, 130.49, 128.98, 128.96, 125.05, 121.84, 120.85, 119.08, 48.55; MS (EI) *m/e* 276 (23), 275 (21), 274 (57, M+), 273 (13), 225 (28), 149 (13), 148 (12), 140 (19), 136 (12), 127 (33), 125 (100), 120 (15), 89 (18), 85 (22), 84 (12), 83 (14), 71 (31), 70 (38), 69 (14), 57 (77), 55 (15); HRMS (EI) *m/e* (M+) calcd. 274.0331, found 274.0331.

**Benzothiazol-2-yl-(3-methyl-benzyl)-amine:** *(Table 1, entry 3)*

Obtained in 59% yield (Pd cat., 85% conv.) and 85% yield (Cu cat., 98% conv.); White powdery solid; m.p = 111.5-114.5°C (CH2Cl2/CDCl3); Rƒ = 0.33 (2:1 hexanes:EtOAc); IR (NaCl)  3186, 2898, 1622, 1574, 1451, 1430, 1345, 1271, 1260, 1153, 1051, 880, 786, 751, 686 cm-1; 1H NMR (300 MHz, CDCl3)  7.57-7.51 (1H, dd, *J* = 8.0, 0.6 Hz), 7.38-7.32 (1H, d, *J* = 8.1 Hz), 7.28-7.10 (2H, m, aromatics), 7.16 (1H, bs), 7.08-7.00 (1H, td, *J* = 7.6, 0.9 Hz), 7.00-6.90 (2H, m, aromatics), 6.85-6.78 (1H, dd, *J* = 8.2, 2.4 Hz), 4.57 (2H, s), 3.73 (3H, s); 13C NMR (75 MHz, CDCl3)  168.01, 159.91, 152.01, 139.05, 130.19, 129.76, 125.89, 121.40, 120.77, 119.77, 118.59, 113.26, 113.01, 55.12, 49.35; MS (EI) *m/e* 271 (19), 270 (100), 269 (29), 255 (11), 136 (40), 122 (10), 121 (88), 91 (39), 78 (30), 77 (20), 65 (21); HRMS (EI) *m/e* (M+) calcd. 270.0827, found 270.0827.

**N-[2-(3,4-dimethoxyphenyl)ethyl]-1,3-benzothiazol-2-amine:** *(Table 1, entry 4)*

Obtained in 80% yield (Pd cat., 80% conv.) and 90% yield (Cu cat., >98% conv.); White powdery solid from 2-bromophenylthiourea; Obtained in 94% yield (Pd cat., 95% conv.) and 99% yield (Cu cat., >98% conv.) from 2-iodophenylthiourea; White solid; m.p = 128.5-131°C (CH2Cl2/CDCl3); Rƒ = 0.38 (2:1 hexanes:EtOAc); IR (NaCl)  3354, 3229, 2933, 1598, 1550, 1515, 1445, 1359, 1262, 1235, 1156, 1141, 1027, 807, 754; 1H NMR (300 MHz, CDCl3)  7.57-7.42 (1H, d, *J* = 7.8 Hz), 7.47-7.42 (1H, d, *J* = 8.0 Hz), 7.25 (1H, td, *J* = 7.7, 0.8 Hz), 7.04 (1H, td, *J* = 7.6, 0.6 Hz), 6.78-6.66 (3H, m, aromatics), 6.22 (1H, bs), 3.81 (6H, s), 3.64 (2H, t, *J* = 6.9 Hz), 2.91 (2H, *J* = 6.9 Hz); 13C NMR (75 MHz, CDCl3)  167.10, 152.01, 148.69, 147.43, 130.58, 129.99, 125.63, 121.17, 120.53, 120.49, 118.40, 111.73, 111.19, 55.87, 55.80, 46.75, 35.19; MS (EI) *m/e* 314 (7, M+) 165 (15), 164 (100), 163 (28), 151 (21), 149 (10), 136 (10); HRMS (EI) *m/e* (M+) calcd. 314.1089, found 314.1089.

**N-(tetrahydrofuran-2-ylmethyl)-1,3-benzothiazol-2-amine:** *(Table 1, entry 5)*

Obtained in 52% yield (Pd cat., >98% conv.) and 85% yield (Cu cat., > 98% conv.); White solid; m.p = 89-92°C (CH2Cl2/CDCl3); Rƒ = 0.32 (1:1 hexanes:EtOAc); IR (NaCl)  3238, 2973, 2870, 1600, 1569, 1552, 1454, 1445, 1213, 1074, 752, 725 cm-1; 1H NMR (300 MHz, CDCl3)  7.51 (2H, d, *J* = 8.1 Hz), 7.24 (1H, td, *J* = 7.7, 1.1 Hz), 7.03 (1H, td, *J* = 7.1, 1.0 Hz), 6.45 (1H, bs), 4.20-4.08 (1H, m), 3.91-3.64 (3H, m), 3.44-3.34 (1H, m), 2.07-1.81 (3H, m), 1.70-1.57 (1H, m); 13C NMR (75 MHz, CDCl3)  167.265, 152.447, 130.500, 125.828, 121.532, 120.692, 118.875, 77.304, 68.176, 48.876, 28.659, 25.830; MS (EI) *m/e* 235 (12), 234 (41, M+), 164 (20), 163 (58), 152 (10), 151 (24), 150 (100), 136 (29), 135 (14), 109 (11), 71(33); HRMS (EI) *m/e* (M+) calcd. 234.0827, found 234.0827.

**1-Benzothiazol-2-yl-1,2,3,4-tetrahydro-isoquinoline:** *(Table 1, entry 6)*

Obtained in 98% yield (Cu cat., >98% conv.) and 94% yield (Pd cat., >98% conv.) from 2-bromophenylthiourea; Obtained in 99% yield (Cu cat., >98% conv.) and 99% yield (Pd cat., >98% conv.) from 2-iodiphenylthiourea; White crystalline solid; m.p = 143-146°C (CH2Cl2/CDCl3); Rƒ = 0.57 (2:1 hexanes:EtOAc); IR (NaCl)  2854, 1664, 1596, 1534, 1444, 1340, 1291, 1110, 927, 818, 745, 724, 668 cm-1; 1H NMR (300 MHz, CDCl3)  7.65-7.57 (1H, m, aromatics), 7.31 (1H, ddd, *J* = 8.2, 7.4, 1.4 Hz), 7.24-7.16 (5H, m, aromatics), 7.11-7.04 (1H, ddd, *J* = 8.0, 7.7, 1.4 Hz), 4.82 (2H, s), 3.88 (2H, t, *J* = 6.0 Hz), 3.03 (2H, t, *J* = 5.9 Hz); 13C NMR (75 MHz, CDCl3)  168.12, 152.82, 134.32, 132.57, 130.49, 128.57, 126.85, 126.57, 126.41, 126.01, 121.20, 120.68, 119.00, 49.63, 46.19, 28.79; MS (EI) *m/e* 267 (23), 266 (100), 266 (14), 265 (14), 249 (21), 150 (12), 135 (12), 117 (53), 115 (16), 104 (17), 103 (12), 78 (11); HRMS (EI) *m/e* (M+) calcd. 266.0878, found 266.0888.

**1-Benzothiazol-2-yl-1,2,3,4-tetrahydro-quinoline:** *(Table 1, entry 7)*

Obtained in 94% yield (Cu cat., >98% conv.), and 87% yield (Pd cat., >98% conv.) from 2-bromophenylthiourea; Obtained in 99% yield (Cu cat., >98% conv.), and 99% yield (Pd cat., >98% conv.) from 2-iodophenylthiourea; Tan oil; Rƒ = 0.55 (3:1 hexanes:EtOAc); IR (NaCl)  3059, 2944, 1592, 1511, 1493, 1454, 1443, 1301, 1252, 1200, 752, 725 cm-1; 1H NMR (300 MHz, CDCl3)  7.88 (1H, d, *J* = 8.1 Hz), 7.62 (2H, qd, *J* = 8.1, 0.5 Hz), 7.33 (1H, td, *J* = 8.2, 1.2 Hz), 7.27-7.04 (4H, m, aromatics), 4.09 (2H, t, *J* = 6.17 Hz), 2.81 (2H, t, *J* = 6.4 Hz), 2.06 (2H, p, *J* = 6.2 Hz); 13C NMR (75 MHz, CDCl3)  166.51, 151.72, 140.21, 130.64, 130.27, 128.91, 126.48, 125.78, 124.09, 122.16, 121.07, 120.39, 119.47, 49.18, 27.23, 23.30; MS (EI) *m/e* 267 (24), 266 (100), 265 (45), 251 (21), 237 (16), 136 (24), 132 (20), 131 (33), 130 (24), 117 (21); HRMS (EI) *m/e* (M+) calcd. 266.0878, found 266.0878.

**2-Piperidin-1-yl-benzothiazole:** *(Table 1, entry 8)*

Obtained in 87% yield (Cu cat., >98% conv.) and 94% yield (Pd cat., >98% conv.); White powdery solid; m.p = 96-98°C (CH2Cl2/CDCl3); IR (NaCl)  2939, 2850, 1593, 1535, 1442, 1334, 1288, 1258, 1122, 851, 760 cm-1; Rƒ = 0.51 (3:1 hexanes:EtOAc); 1H NMR (300 MHz, CDCl3)  7.58-7.50 (2H, m, aromatics), 7.26 (1H, td, *J* = 7.7, 1.2 Hz), 7.03 (1H, td, *J* = 7.6, 1.1 Hz), 3.62-3.52 (4H, m), 1.72-1.60 (6H, m); 13C NMR (100 MHz, DMSO-d6)  167.92, 152.69, 130.32, 125.85, 120.99, 120.89, 118.30, 49.08, 24.81, 23.66. (*Z. Chem.* **1968**, *8*, 181-183.)

**8-Benzothiazol-2-yl-1,4-dioxa-8-azaspiro[4.5]decane:** *(Table 1, entry 9)*

Obtained in quant. yield (Cu cat., >98% conv.), and 89% yield (Pd cat., >98% conv.); Off-white crystalline solid; m.p = 118.5-121°C (CH2Cl2/CDCl3); Rƒ = 0.43 (1:1 hexanes:EtOAc); IR (NaCl)  3420, 2959, 2881, 1596, 1541, 1446, 1363, 1290, 1146, 1101, 944, 924, 753, 725 cm-1; 1H NMR (300 MHz, CDCl3)  7.62-7.50 (2H, m, aromatics), 7.27 (1H, td, *J* = 7.5, 1.1 Hz), 7.05 (1H, td, *J* = 7.6, 1.1 Hz), 4.00 (4H, s), 3.75 (4H, t, *J* = 5.83 Hz), 1.84 (4H, t, *J* = 5.9 Hz); 13C NMR (75 MHz, CDCl3)  167.81, 152.54, 130.69, 125.68, 121.06, 120.39, 118.71, 106.69, 64.46, 46.81, 34.45; MS (EI) *m/e* 277 (25), 276 (100, M+), 177 (11), 176 (25), 175 (14), 163 (28), 162 (10), 149 (11), 135 (12), 99 (14); HRMS (EI) *m/e* (M+) calcd. 276.0933, found 276.0933.

**4-Benzothiazol-2-yl-piperazine-1-carboxylic acid tert-butyl ester:** *(Table 1, entry 10)*

Obtained in 93% yield (Cu cat., >98% conv.), and 86% yield (Pd cat., >98% conv.); White crystalline solid; m.p = 126.5-129.5°C (CH2Cl2/CDCl3); Rƒ = 0.45 (2:1 hexanes:EtOAc); IR (NaCl)  2976, 1697,1596, 1540, 1445, 1420, 1365, 1293, 1247, 1168, 1124, 865, 754, 726 cm-1; 1H NMR (300 MHz, CDCl3)  7.55 (2H, t, *J* = 7.7 Hz), 7.26 (1H, td, 7.7, 1.2 Hz), 7.05 (1H, td, *J* = 7.5, 1.1 Hz), 3.56 (8H, m), 1.48 (9H, s); 13C NMR (75 MHz, CDCl3)  168.06, 154.02, 152.07, 130.32, 125.69, 121.28, 120.38, 118.91, 80.10, 48.09, 42.96, 28.37; MS (EI) *m/e* 320 (16), 319 (69), 263 (23), 246 (18), 177 (21), 176 (43), 164 (20), 163 (100), 151 (44), 150 (19), 136 (10), 135 (10), 57 (76), 56 (21); HRMS (EI) *m/e* (M+) calcd. 319.1354, found 319.1354.

**3-(Benzothiazol-2-yl-methyl-amino)-propionitrile:** *(Table 1, entry 11)*

Obtained in 84% yield (Cu cat., >98% conv.), and 84% yield (Pd cat., >98% conv.) from 2-bromophenylthiourea; Obtained in 99% yield (Cu cat., >98% conv.), and 93% yield (Pd cat., > 98% conv.) from 2-iodophenylthiourea; White crystalline solid; m.p = 92.5-95°C (CH2Cl2/CDCl3); Rƒ = 0.22 (3:2 hexanes:EtOAc); IR (NaCl)  3059, 2926, 2248, 1597, 1546, 1445, 1423, 1364, 1313, 1297, 1116, 754, 726 cm-1; 1H NMR (300 MHz, CDCl3)  7.63 (1H, dt, 7.8 Hz, *J* = 0.6 Hz), 7.57 (1H, dd, *J* = 8.1, 0.5 Hz), 7.31 (1H, tt, *J* = 7.7, 0.5 Hz), 7.10 (1H, tt, *J* = 7.5, 0.5 Hz), 3.91 (2H, t, *J* = 6.5 Hz), 3.26 (3H, s), 2.84 (2H, t, *J* = 6.5 Hz); 13C NMR (100 MHz, DMSO-d6)  167.40, 152.67, 130.67, 126.01, 121.17, 121.11, 119.07, 118.58, 47.74, 38.39, 15.26; MS (EI) *m/e* 218 (13), 217 (73, M+), 178 (15), 177 (100), 164 (48), 163 (12), 136 (54), 135 (22), 109 (14), 108 (10); HRMS (EI) *m/e* (M+) calcd. 217.0674, found 217.0674.

**Benzyl-(4-fluoro-benzothiazol-2-yl)-amine:** *(Table 1, entry 12)*

Obtained in 69% yield (Cu cat., 90% conv.) and 93% yield (Pd cat., 90% conv.); White powdery solid; m.p = 180-184°C (CH2Cl2/CDCl3); Rƒ = 0.14 (3:1 hexanes:EtOAc); IR (NaCl)  3222, 2901, 1622, 1599, 1558, 1464, 1358, 1337, 1264, 1196, 1120, 974, 819, 744 cm-1; 1H NMR (400 MHz, DMSO-d6)  8.48 (1H, t, *J* = 5.6 Hz), 7.60 (1H, dd, *J* = 8.8, 2.7 Hz), 7.43-7.21 (5H, m, aromatics), 7.05 (1H, td, *J* = 10.4, 1.6 Hz), 4.58 (2H, d, *J* = 5.8 Hz), 3.34 (1H, s); 13C NMR (100 MHz, DMSO-d6)  166.09 (d, *J* = 2.0), 157.19 (d, *J* = 236.3 Hz), 149.10 (d, *J* = 1.4 Hz), 138.82, 131.43 (d, *J* = 11.2 Hz), 128.37, 127.38, 127.04, 118.48 (d, *J* = 8.9 Hz), 112.82 (d, *J* = 23.5 Hz), 107.87 (d, *J* = 27.2 Hz), 47.20. (*Indian Drugs* **1980**, *27*, 350-353.)

**Benzyl-(4-methyl-benzothiazol-2-yl)-amine:** *(Table 1, entry 13)*

Obtained in 97% yield (Cu cat., >98% conv.) and 71% yield (Pd cat., ~80% conv.); White crystalline solid; m.p = 176-180°C (CH2Cl2/CDCl3); Rƒ = 0.35 (2:1 hexanes:EtOAc); IR (NaCl)  2901, 2853, 1622, 1558, 1469, 1357, 1270, 1134, 974, 815, 745 cm-1; 1H NMR (300 MHz, CDCl3) 7.43-7.27 (7H, m, aromatics), 7.09 (1H, d, *J* = 8.2 Hz), 5.79 (1H, bs), 4.62 (2H, s), 2.39 (3H, s); 1H NMR (400 MHz, DMSO-d6)  8.41 (1H, t, *J* = 5.5 Hz), 7.49 (1H, s), 7.45-7.34 (3H, m, aromatics), 7.34-7.26 (2H, m, aromatics), 7.06 (1H, d, *J* = 8.24 Hz), 4.61 (2H, d, *J* = 5.5 Hz), 2.34 (3H, s); 13C NMR (100 MHz, DMSO-d6)  165.51, 150.30, 139.01, 130.47, 130.05, 128.33, 127.37, 126.97, 126.52, 120.86, 117.75, 47.17, 20.72. (*J. Heterocycl. Chem****.*  1975**, *12*, 607-608.)

**Benzyl-(4-methyl-6-fluoro-benzothiazol-2-yl)-amine:** *(Table 1, entry 14)*

Obtained in 89% yield (Cu cat., >98% conv.) and 88% yield (Pd cat., >98% conv.); Tan powdery solid; m.p = 163-166.5°C (CH2Cl2/CDCl3); Rƒ = 0.62 (3:2 hexanes:EtOAc); IR (NaCl)  3215, 2920, 1607, 1578, 1540, 1450, 1358, 1269, 1220, 1062, 835, 794, 730, 696 cm-1; 1H NMR (300 MHz, CDCl3)  7.36-7.22 (7H, m, aromatics), 6.99 (1H, bs), 4.57 (2H, s), 2.33 (3H, s); 13C NMR (75 MHz, DMSO-d6)  165.89, 148.27, 138.51, 131.62, 130.98, 129.39, 128.37, 127.66, 127.16, 120.49, 110.27, 47.52, 20.24; HRMS (ESI) *m/e* (M+H)+ calcd. 333.0061, found 333.0055.

**Benzyl-(5-trifluoromethyl-benzothiazol-2-yl)-amine:** *(Table 1, entry 15)*

Obtained in 78% yield (Cu cat., 98% conv.) and 90% yield (Pd cat., 98% conv.); White fine crystalline solid; m.p = 200-203°C (CH2Cl2/CDCl3); Rƒ = 0.21 (3:1 hexanes:EtOAc); IR (NaCl)  3196, 2850, 1624, 1576, 1456, 1427, 1355, 1332, 1142, 1122, 928, 886, 820 cm-1; 1H NMR (300 MHz, CDCl3)  7.75 (1H, s), 7.66 (1H, d, *J* = 8.2 Hz), 7.43-7.29 (6H, m, aromatics), 5.88 (1H, bs), 4.66 (2H, s); 13C NMR (100 MHz, DMSO-d6)  167.79, 152.55, 138.49, 135.03, 128.43, 127.43, 127.14, 126.54 (q, *J* = 31.5 Hz), 124.59 (q, *J* = 271.9 Hz), 121.92, 117.07 (q, *J* = 4.0 Hz), 114.03 (q, *J* = 4.0 Hz), 47.26; HRMS (ESI) *m/e* (M+H)+ calcd. 309.0673, found 309.0667.
